# Supplementary material for: Efficacy of a Spatial Repellent for Control of Malaria in Indonesia: A Cluster-Randomized Controlled Trial
Source: PubMed Central journal article supplement (PMC7356406; doi:10.4269/ajtmh.19-0554), 2020-05-18

**Supplemental Information 2. Usage of long-lasting insecticidal nets (LLIN) during baseline and intervention follow-up periods of the trial, in both the spatial repellent (SR) and placebo arms.**

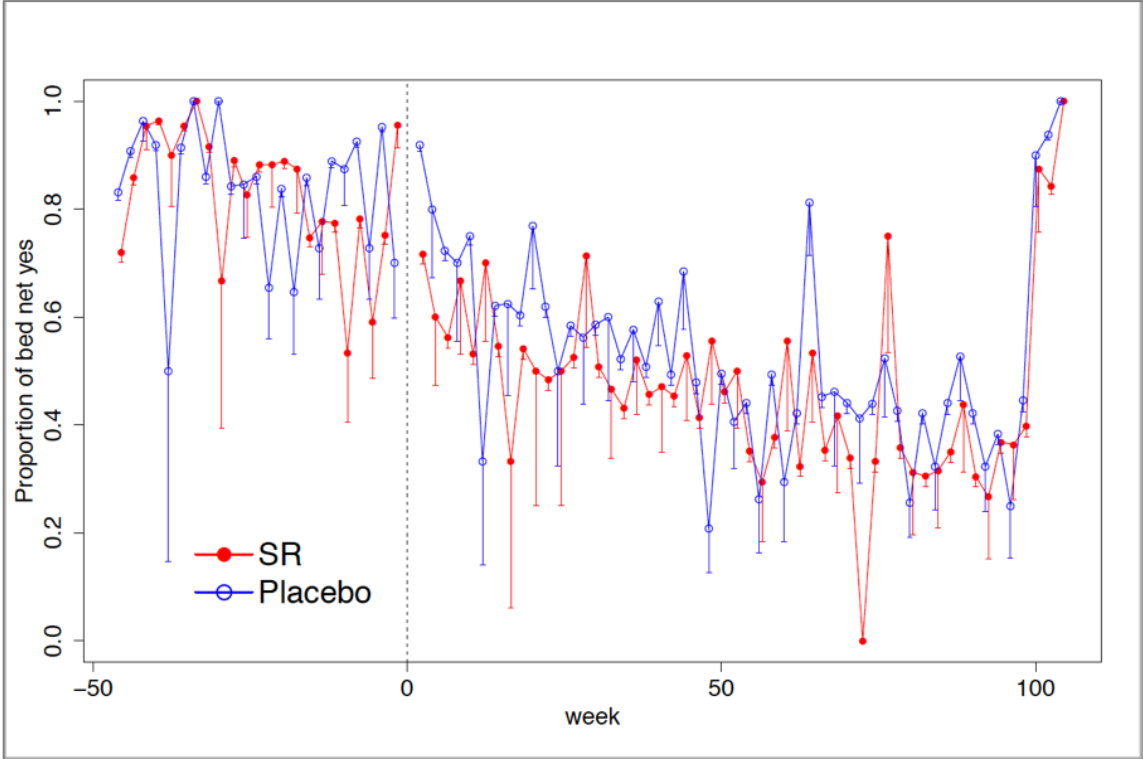

Supplement: tpmd190554.SD2.pdf [file tpmd190554.SD2.pdf]
