# Supplementary material for: Efficacy of a Spatial Repellent for Control of Malaria in Indonesia: A Cluster-Randomized Controlled Trial
Source: PubMed Central journal article supplement (PMC7356406; doi:10.4269/ajtmh.19-0554), 2020-05-18
Supplement: tpmd190554.SD3.pdf [file tpmd190554.SD3.pdf]

**Supplemental Information 3. Frequency (percentage) of anopheline species captured during sentinel human-landing catch (HLC) based on adult morphological character identification\*.**

| <i>Anopheles</i> species | Baseline Period              |                              |                              |                              | Intervention Period          |                              |                              |                              |
|--------------------------|------------------------------|------------------------------|------------------------------|------------------------------|------------------------------|------------------------------|------------------------------|------------------------------|
|                          | Indoor                       |                              | Outdoor                      |                              | Indoor                       |                              | Outdoor                      |                              |
|                          | SR                           | Placebo                      | SR                           | Placebo                      | SR                           | Placebo                      | SR                           | Placebo                      |
| <b>Total</b>             | <b>2243</b><br><b>(100%)</b> | <b>3327</b><br><b>(100%)</b> | <b>2896</b><br><b>(100%)</b> | <b>3462</b><br><b>(100%)</b> | <b>3883</b><br><b>(100%)</b> | <b>4897</b><br><b>(100%)</b> | <b>4372</b><br><b>(100%)</b> | <b>4834</b><br><b>(100%)</b> |
| <i>An. aconitus</i>      | 467<br>(20.82%)              | 80<br>(2.40%)                | 768<br>(26.52%)              | 78<br>(2.25%)                | 2015<br>(51.89%)             | 173<br>(3.53%)               | 2249<br>(51.44%)             | 162<br>(3.35%)               |
| <i>An. annularis</i>     | 55<br>(2.45%)                | 633<br>(19.03%)              | 70<br>(2.42%)                | 567<br>(16.38%)              | 82<br>(2.11%)                | 544<br>(11.11%)              | 99<br>(2.26%)                | 493<br>(10.20%)              |
| <i>An. balabacensis</i>  | 0<br>(0%)                    | 0<br>(0%)                    | 0<br>(0%)                    | 0<br>(0%)                    | 2<br>(0.05%)                 | 1<br>(0.02%)                 | 0<br>(0%)                    | 0<br>(0%)                    |
| <i>An. barbirostris</i>  | 41<br>(1.83%)                | 148<br>(4.45%)               | 49<br>(1.69%)                | 132<br>(3.81%)               | 62<br>(1.60%)                | 360<br>(7.35%)               | 56<br>(1.28%)                | 322<br>(6.66%)               |
| <i>An. barbumbrosus</i>  | 0<br>(0%)                    | 0<br>(0%)                    | 0<br>(0%)                    | 0<br>(0%)                    | 1<br>(0.03%)                 | 0<br>(0%)                    | 0<br>(0%)                    | 3<br>(0.06%)                 |
| <i>An. flavirostris</i>  | 355<br>(15.83%)              | 417<br>(12.53%)              | 523<br>(18.06%)              | 504<br>(14.56%)              | 757<br>(19.50%)              | 430<br>(8.78%)               | 1001<br>(22.90%)             | 482<br>(9.97%)               |
| <i>An. indefinitus</i>   | 0<br>(0%)                    | 1<br>(0.03%)                 | 0<br>(0%)                    | 1<br>(0.03%)                 | 2<br>(0.05%)                 | 12<br>(0.25%)                | 4<br>(0.09%)                 | 20<br>(0.41%)                |
| <i>An. karwari</i>       | 0<br>(0%)                    | 0<br>(0%)                    | 0<br>(0%)                    | 0<br>(0%)                    | 0<br>(0%)                    | 0<br>(0%)                    | 1<br>(0.02%)                 | 0<br>(0%)                    |
| <i>An. kochi</i>         | 47<br>(2.10%)                | 501<br>(15.06%)              | 36<br>(1.24%)                | 392<br>(11.32%)              | 90<br>(2.32%)                | 803<br>(16.40%)              | 88<br>(4.71%)                | 836<br>(17.29%)              |
| Leucosphyrus Group       | 0<br>(0%)                    | 1<br>(0.03%)                 | 0<br>(0%)                    | 0<br>(0%)                    | 2<br>(0.05%)                 | 16<br>(1.61%)                | 1<br>(0.02%)                 | 26<br>(0.54%)                |
| <i>An. maculatus</i>     | 61<br>(2.72%)                | 88<br>(2.65%)                | 95<br>(3.28%)                | 88<br>(2.54%)                | 209<br>(5.38%)               | 79<br>(1.61%)                | 206<br>(4.71%)               | 94<br>(1.94%)                |
| <i>An. montanus</i>      | 0<br>(0%)                    | 0<br>(0%)                    | 0<br>(0%)                    | 0<br>(0%)                    | 1<br>(0.03%)                 | 0<br>(0%)                    | 1<br>(0.02%)                 | 0<br>(0%)                    |
| <i>An. parangensis</i>   | 0<br>(0%)                    | 0<br>(0%)                    | 0<br>(0%)                    | 0<br>(0%)                    | 0<br>(0%)                    | 1<br>(0.02%)                 | 0<br>(0%)                    | 0<br>(0%)                    |
| Hyrcanus Group           | 0<br>(0%)                    | 0<br>(0%)                    | 0<br>(0%)                    | 0<br>(0%)                    | 0<br>(0%)                    | 4<br>(0.08%)                 | 0<br>(0%)                    | 2<br>(0.04%)                 |
| <i>An. subpictus</i>     | 15<br>(0.67%)                | 7<br>(0.21%)                 | 13<br>(0.45%)                | 15<br>(0.43%)                | 3<br>(0.08%)                 | 105<br>(2.14%)               | 10<br>(0.23%)                | 85<br>(1.76%)                |
| <i>An. sundaicus</i>     | 1001<br>(44.63%)             | 401<br>(12.05%)              | 1154<br>(39.85%)             | 562<br>(16.23%)              | 136<br>(3.50%)               | 61<br>(1.25%)                | 128<br>(2.93%)               | 62<br>(1.28%)                |
| <i>An. tessellatus</i>   | 94<br>(4.19%)                | 317<br>(9.53%)               | 89<br>(3.07%)                | 295<br>(8.52%)               | 205<br>(5.28%)               | 1246<br>(25.44%)             | 192<br>(4.39%)               | 1215<br>(25.13%)             |
| <i>An. umbrosus</i>      | 0<br>(0%)                    | 0<br>(0%)                    | 1<br>(0.03%)                 | 0<br>(0%)                    | 0<br>(0%)                    | 0<br>(0%)                    | 0<br>(0%)                    | 0<br>(0%)                    |
| <i>An. vagus</i>         | 107<br>(4.77%)               | 733<br>(22.03%)              | 98<br>(3.38%)                | 828<br>(23.92%)              | 315<br>(8.11%)               | 1061<br>(21.67%)             | 334<br>(7.64%)               | 1031<br>(21.33%)             |
| Unknown                  | 0<br>(0%)                    | 0<br>(0%)                    | 0<br>(0%)                    | 0<br>(0%)                    | 1<br>(0.03%)                 | 1<br>(0.02%)                 | 2<br>(0.04%)                 | 1<br>(0.02%)                 |

\*Misidentification possible depending on physical condition of specimen, molecular methods required to separate out some members in species groups and complexes.
