# Supplementary material for: Efficacy of a Spatial Repellent for Control of Malaria in Indonesia: A Cluster-Randomized Controlled Trial
Source: PubMed Central journal article supplement (PMC7356406; doi:10.4269/ajtmh.19-0554), 2020-05-18
Supplement: tpmd190554.SD4.pdf [file tpmd190554.SD4.pdf]

## Supplemental Information 4. CONSORT 2010 Checklist

| Section/Topic                    | Item No | Checklist item                                                                                                                                                                              | Reported on page No                         |
|----------------------------------|---------|---------------------------------------------------------------------------------------------------------------------------------------------------------------------------------------------|---------------------------------------------|
| <b>Title and abstract</b>        |         |                                                                                                                                                                                             |                                             |
|                                  | 1a      | Identification as a randomised trial in the title                                                                                                                                           | <u>1</u>                                    |
|                                  | 1b      | Structured summary of trial design, methods, results, and conclusions (for specific guidance see CONSORT for abstracts)                                                                     | <u>2</u>                                    |
| <b>Introduction</b>              |         |                                                                                                                                                                                             |                                             |
| Background and objectives        | 2a      | Scientific background and explanation of rationale                                                                                                                                          | <u>3 - 5</u>                                |
|                                  | 2b      | Specific objectives or hypotheses                                                                                                                                                           | <u>5</u>                                    |
| <b>Methods</b>                   |         |                                                                                                                                                                                             |                                             |
| Trial design                     | 3a      | Description of trial design (such as parallel, factorial) including allocation ratio                                                                                                        | <u>8</u>                                    |
|                                  | 3b      | Important changes to methods after trial commencement (such as eligibility criteria), with reasons                                                                                          | <u>6</u>                                    |
| Participants                     | 4a      | Eligibility criteria for participants                                                                                                                                                       | <u>10</u>                                   |
|                                  | 4b      | Settings and locations where the data were collected                                                                                                                                        | <u>7-8</u>                                  |
| Interventions                    | 5       | The interventions for each group with sufficient details to allow replication, including how and when they were actually administered                                                       | <u>10</u>                                   |
| Outcomes                         | 6a      | Completely defined pre-specified primary and secondary outcome measures, including how and when they were assessed                                                                          | <u>16-18, S1. Statistical Analyses Plan</u> |
|                                  | 6b      | Any changes to trial outcomes after the trial commenced, with reasons                                                                                                                       | <u>n/a</u>                                  |
| Sample size                      | 7a      | How sample size was determined                                                                                                                                                              | <u>9</u>                                    |
|                                  | 7b      | When applicable, explanation of any interim analyses and stopping guidelines                                                                                                                | <u>n/a</u>                                  |
| Randomisation:                   |         |                                                                                                                                                                                             |                                             |
| Sequence generation              | 8a      | Method used to generate the random allocation sequence                                                                                                                                      | <u>11</u>                                   |
|                                  | 8b      | Type of randomisation; details of any restriction (such as blocking and block size)                                                                                                         | <u>11</u>                                   |
| Allocation concealment mechanism | 9       | Mechanism used to implement the random allocation sequence (such as sequentially numbered containers), describing any steps taken to conceal the sequence until interventions were assigned | <u>11</u>                                   |
| Implementation                   | 10      | Who generated the random allocation sequence, who enrolled participants, and who assigned participants to interventions                                                                     | <u>11</u>                                   |
| Blinding                         | 11a     | If done, who was blinded after assignment to interventions (for example, participants, care providers, those                                                                                | <u>11</u>                                   |

|                                                      |     |                                                                                                                                                   |                              |
|------------------------------------------------------|-----|---------------------------------------------------------------------------------------------------------------------------------------------------|------------------------------|
|                                                      |     | assessing outcomes) and how                                                                                                                       |                              |
| Statistical methods                                  | 11b | If relevant, description of the similarity of interventions                                                                                       | 10                           |
|                                                      | 12a | Statistical methods used to compare groups for primary and secondary outcomes                                                                     | 16-18                        |
|                                                      | 12b | Methods for additional analyses, such as subgroup analyses and adjusted analyses                                                                  | 16-18                        |
| <b>Results</b>                                       |     |                                                                                                                                                   |                              |
| Participant flow (a diagram is strongly recommended) | 13a | For each group, the numbers of participants who were randomly assigned, received intended treatment, and were analysed for the primary outcome    | Fig 4. Subject flowchart     |
|                                                      | 13b | For each group, losses and exclusions after randomisation, together with reasons                                                                  | Fig 4. Subject flowchart     |
| Recruitment                                          | 14a | Dates defining the periods of recruitment and follow-up                                                                                           | Fig 4. Subject flowchart     |
|                                                      | 14b | Why the trial ended or was stopped                                                                                                                | n/a                          |
| Baseline data                                        | 15  | A table showing baseline demographic and clinical characteristics for each group                                                                  | Table 2. Baseline covariates |
| Numbers analysed                                     | 16  | For each group, number of participants (denominator) included in each analysis and whether the analysis was by original assigned groups           | Table 3. Summary incidence   |
| Outcomes and estimation                              | 17a | For each primary and secondary outcome, results for each group, and the estimated effect size and its precision (such as 95% confidence interval) | 18 - 24                      |
|                                                      | 17b | For binary outcomes, presentation of both absolute and relative effect sizes is recommended                                                       | 18 - 24                      |
| Ancillary analyses                                   | 18  | Results of any other analyses performed, including subgroup analyses and adjusted analyses, distinguishing pre-specified from exploratory         | 18 - 24                      |
| Harms                                                | 19  | All important harms or unintended effects in each group (for specific guidance see CONSORT for harms)                                             | 23                           |
| <b>Discussion</b>                                    |     |                                                                                                                                                   |                              |
| Limitations                                          | 20  | Trial limitations, addressing sources of potential bias, imprecision, and, if relevant, multiplicity of analyses                                  | 25-31                        |
| Generalisability                                     | 21  | Generalisability (external validity, applicability) of the trial findings                                                                         | 25-31                        |
| Interpretation                                       | 22  | Interpretation consistent with results, balancing benefits and harms, and considering other relevant evidence                                     | 32-33                        |
| <b>Other information</b>                             |     |                                                                                                                                                   |                              |
| Registration                                         | 23  | Registration number and name of trial registry                                                                                                    | 5                            |
| Protocol                                             | 24  | Where the full trial protocol can be accessed, if available                                                                                       | n/a                          |
| Funding                                              | 25  | Sources of funding and other support (such as supply of drugs), role of funders                                                                   | 34                           |
